# Supplementary material
Source: PubMed Central journal article supplement (PMC4682301)
Supplement: supp_tpc.15.00552_TPC2015-00552-RAR1_Supplemental_Data.pdf [file supp_tpc.15.00552_TPC2015-00552-RAR1_Supplemental_Data.pdf]

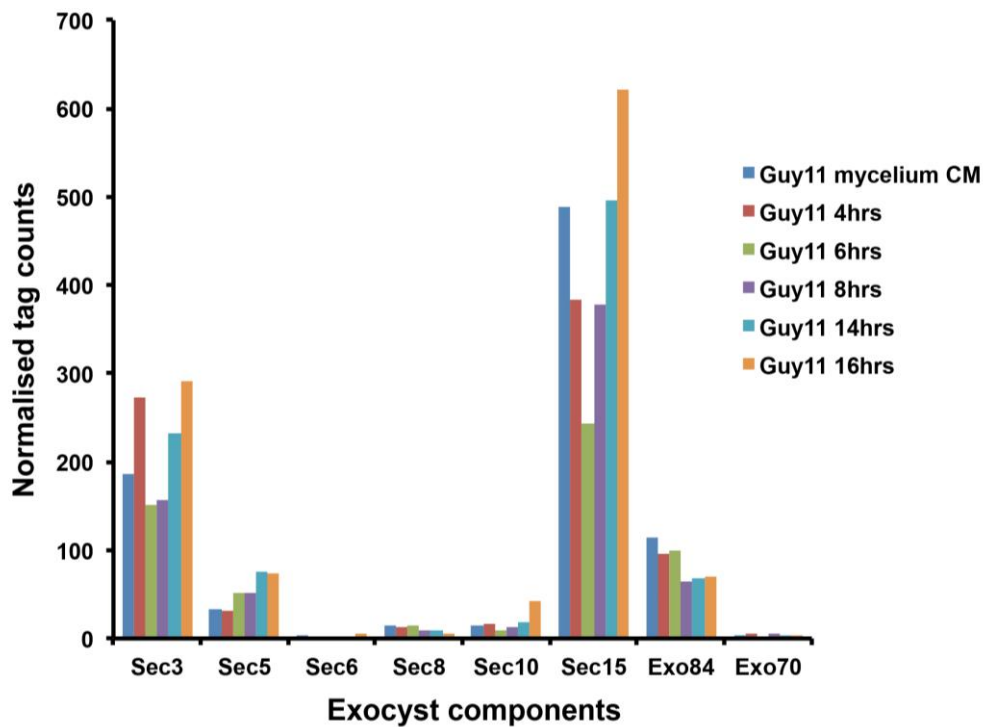

**Supplemental Figure 1. Relative transcript abundance of the exocyst subunit-encoding genes in mycelium and during appressorium development.**

High-throughput (HT)-SuperSAGE analysis was carried out to observed relative expression levels of exocyst genes (from the public data-set of Soanes et al, 2012) (<http://cogeme.ex.ac.uk/supersage>). The bar chart represents relative transcript abundance for each exocyst gene expressed in mycelium and during a time course of appressorium development at 4, 6, 8, 14 and 16 h.

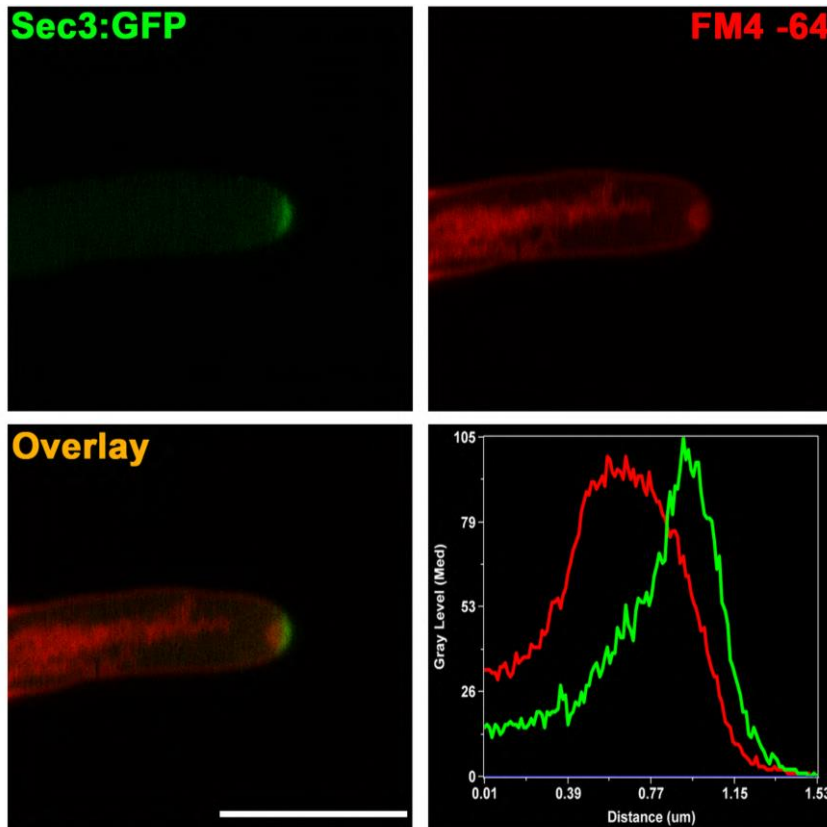

**Supplemental Figure 2. High-resolution epifluorescence micrograph of Sec3-GFP and FM4-64-labelled Spitzenkörper in vegetative hyphae of *Magnaporthe oryzae*.**

Micrograph and linescan graph to show relative localisation of Sec3-GFP and the Spitzenkörper in growing hyphae of *M. oryzae*, labelled with FM4-64. Epifluorescence micrographs were overlaid to observe relative localisation patterns and a line scan graph was generated. Scale bar=10µm.

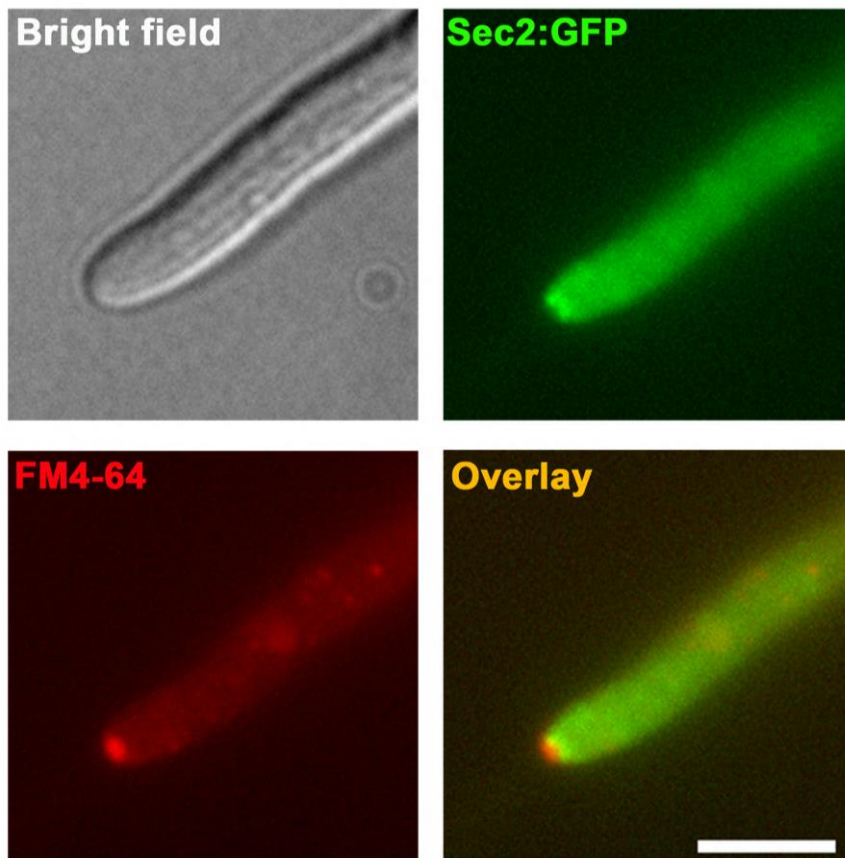

**Supplemental Figure 3. Localisation of Sec2-GFP and FM4-64-labelled Spitzenkörper in vegetative hyphae of *Magnaporthe oryzae*.**

Micrograph and linescan graph to show relative localisation of Sec2-GFP and the Spitzenkörper in growing hyphae of *M. oryzae*, labelled with FM4-64. Epifluorescence micrographs were overlaid to observe relative localisation patterns and a line scan graph was generated. Scale bar=10 $\mu$ m.

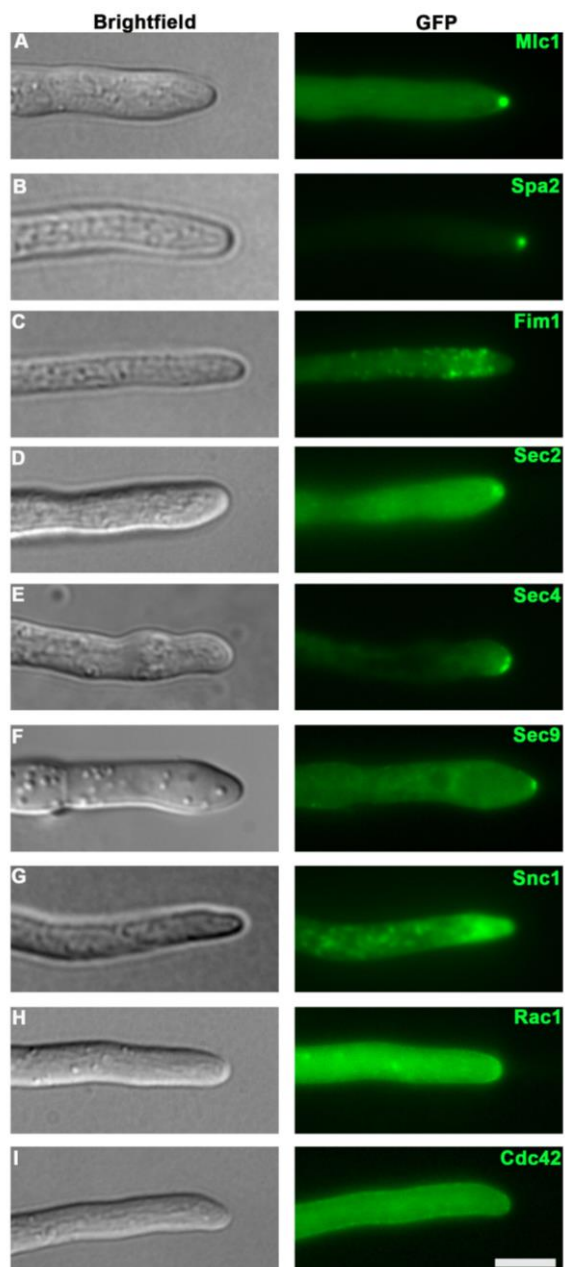

**Supplemental Figure 4. Localization of polarized secretory apparatus in growing vegetative hyphae.**

A range of polarity determinant and secretory protein-encoding genes were tagged with GFP, expressed as single insertions under control of their native promoter and visualized in growing vegetative hyphae (A-I). All images are representative of 3 biological replications of the experiment. **(A)** Myosin light chain protein Mlc1:GFP accumulated as a bright spot at the hyphal tip. **(B)** Polarisome component Spa2:GFP localised to the tip of the hyphae. **(C)** Fimbrin-GFP (Fim1) was expressed in the sub-apical cortical region of hyphae. **(D)** Sec2:GFP, the GEF for Sec4 **(E)**, both localised to the hyphal tip. **(F)** the t-SNARE Sec9:GFP localised to the tips of hyphae. **(G)** The v-SNARE GFP:Snc1 localised in a gradient of vesicles which were concentrated at the hyphal tip. **(H)** The Rho GTPase, GFP:Rac1 localised as a crescent to the hyphal tip. **(I)** The Rho GTPase, GFP:Cdc42 localised the plasma-membrane in a punctate distribution, with increasing concentration at the hyphal tip. Scale bar=10 $\mu$ m.

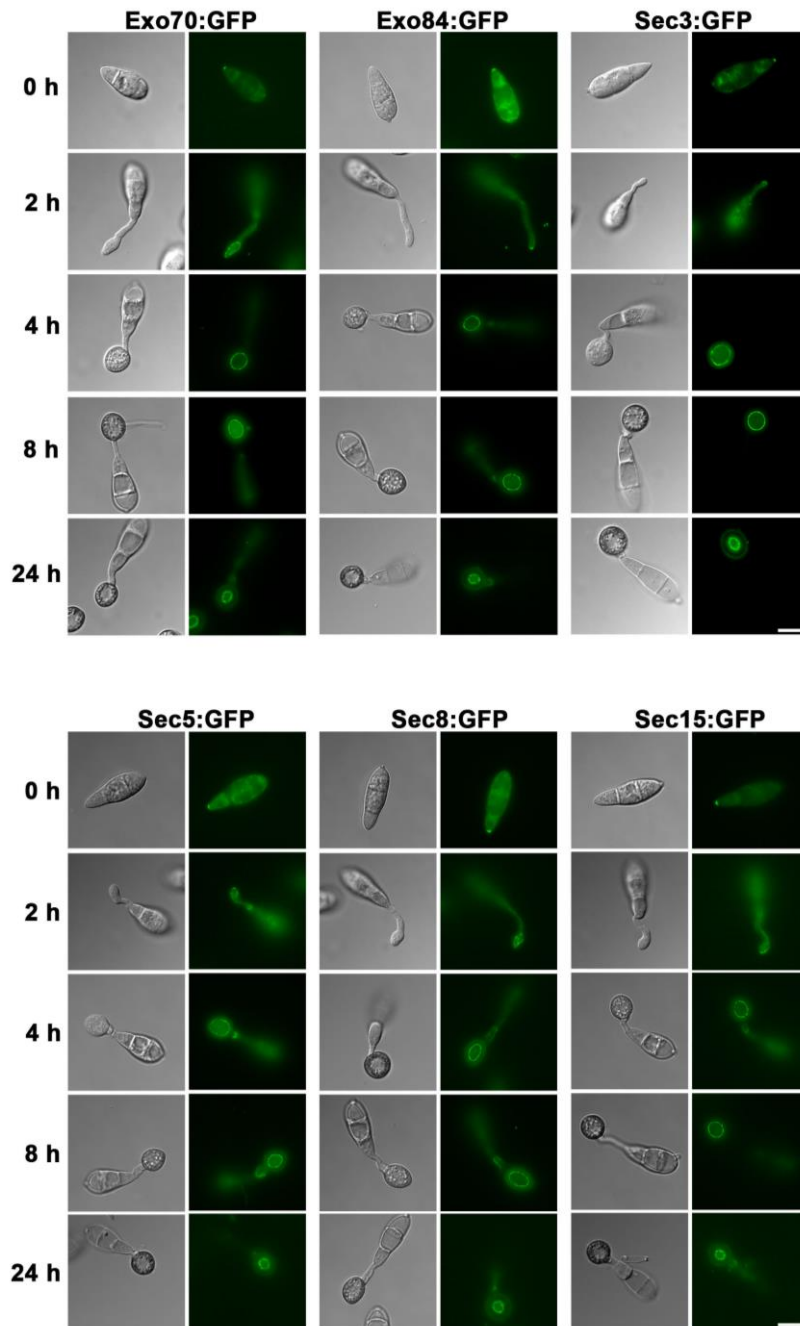

**Supplemental Figure 5. Exocyst localization during a time course of appressorium development in *M. oryzae*.**

Exocyst subunits, Exo70, Exo84, Sec3, Sec5, Sec8 and Sec15 were tagged with C-terminal translational gene fusions expressed under the control of their respective native promoters. Conidia were harvested with each GFP tagged exocyst strains and inoculated on hydrophobic coverslips, and observed by epifluorescence microscopy. All the exocyst subunits shows similar pattern of expression. Early stage of conidia germination all the exocyst are localized the apex or tip of the germ tube. In appressorium from 4 h to 8h all the exocyst subunits localized just under the plasma-membrane. In mature appressorium at 24 h all the exocyst subunits localized at the pore of the appressoria. Scale bar=10 $\mu$ m.

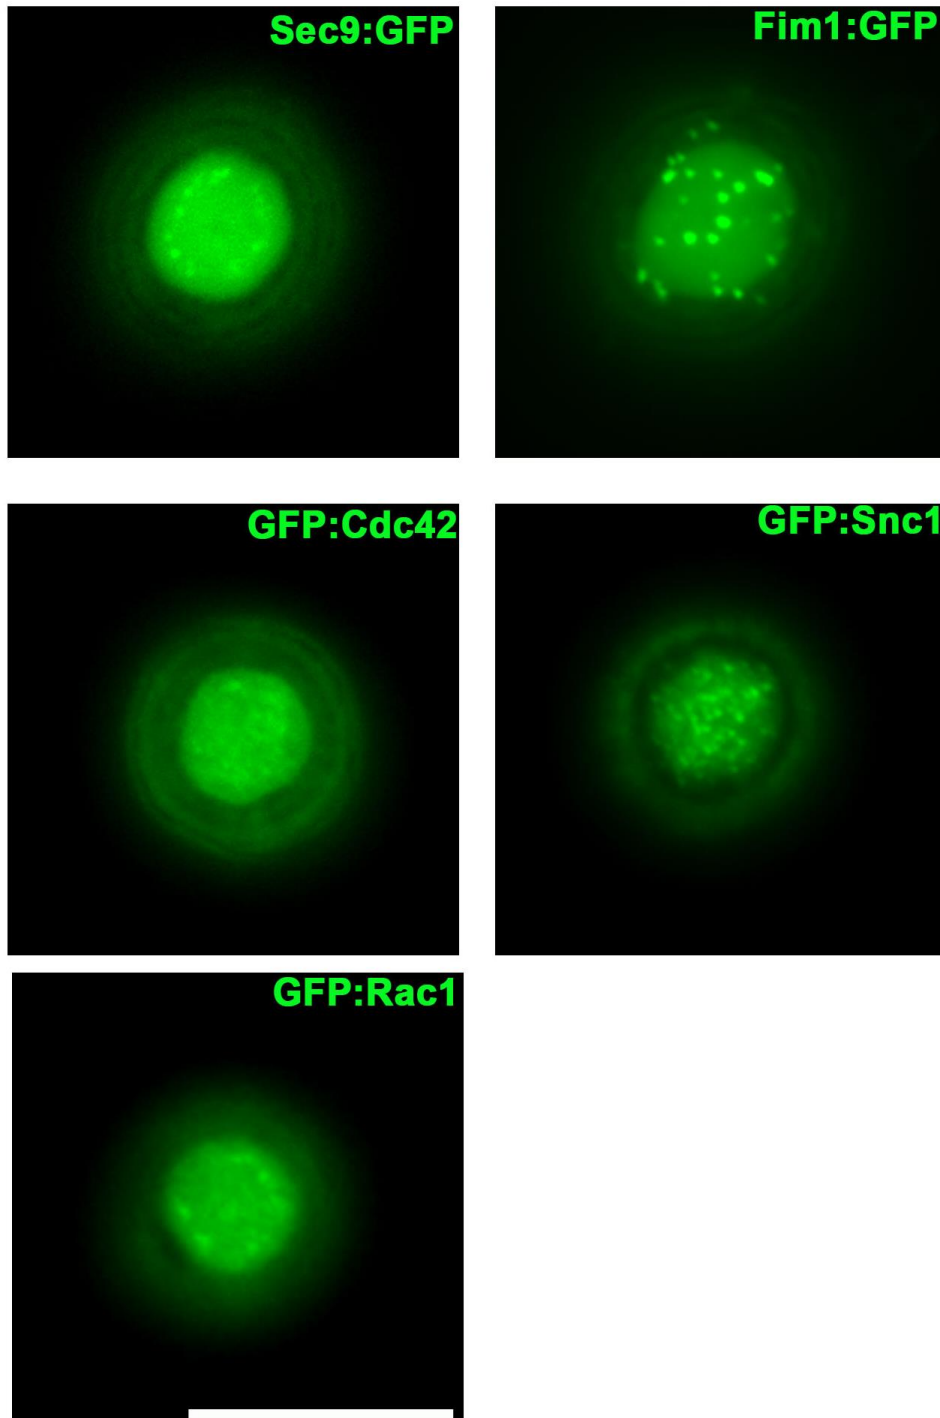

**Supplemental Figure 6. Localization of polarity determinants in the *M. oryzae* appressorium.**

Epifluorescence micrographs of mature appressoria in strains expressing Sec9-GFP, Fim1-GFP, GFP-Cdc42, GFP-Snc1, and GFP-Rac1 gene fusions under their native promoters. The t-SNARE Sec9 shows punctate distribution around the appressorial pore while v-SNARE Snc1 localizes in the pore region. Fim1, Cdc42 and Rac1 were also observed in the centre of the appressorial pore. Scale bar=10 $\mu$ m.

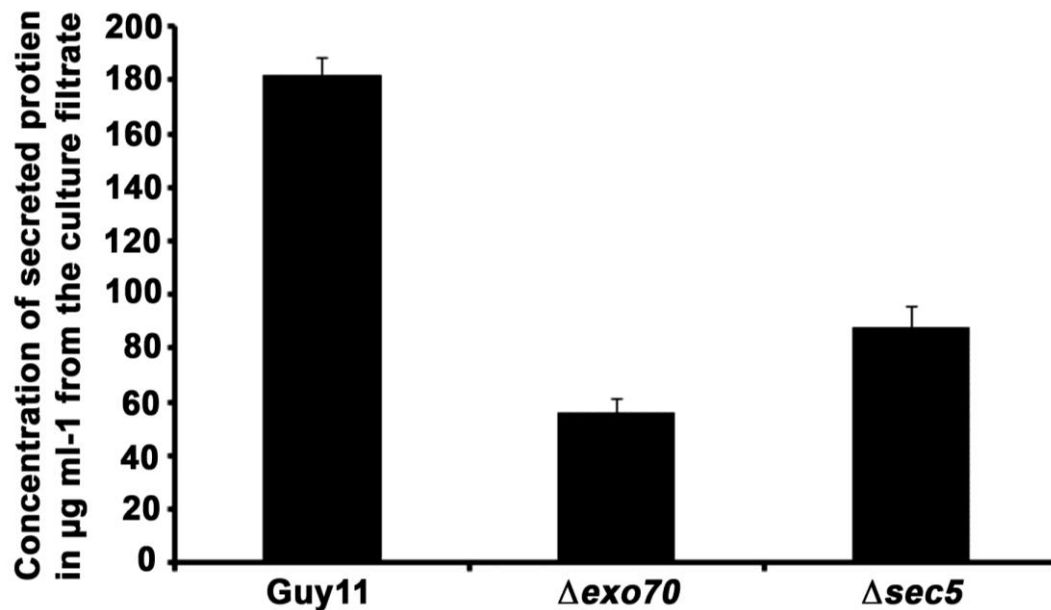

**Supplemental Figure 7. Quantification of secreted protein from culture filtrates of exocyst mutants.**

The wild type strain Guy11,  $\Delta$ sec5 and the  $\Delta$ exo70 mutant strains were grown in liquid CM for 48 h. Mycelium was recovered and transferred to liquid GMM for a further 24 h. Culture filtrates were collected and lyophilised. Total secreted protein was measured by the Bradford method (Bradford, 1976). Values are mean  $\pm$  S.D. for three biological repetitions of the experiment.



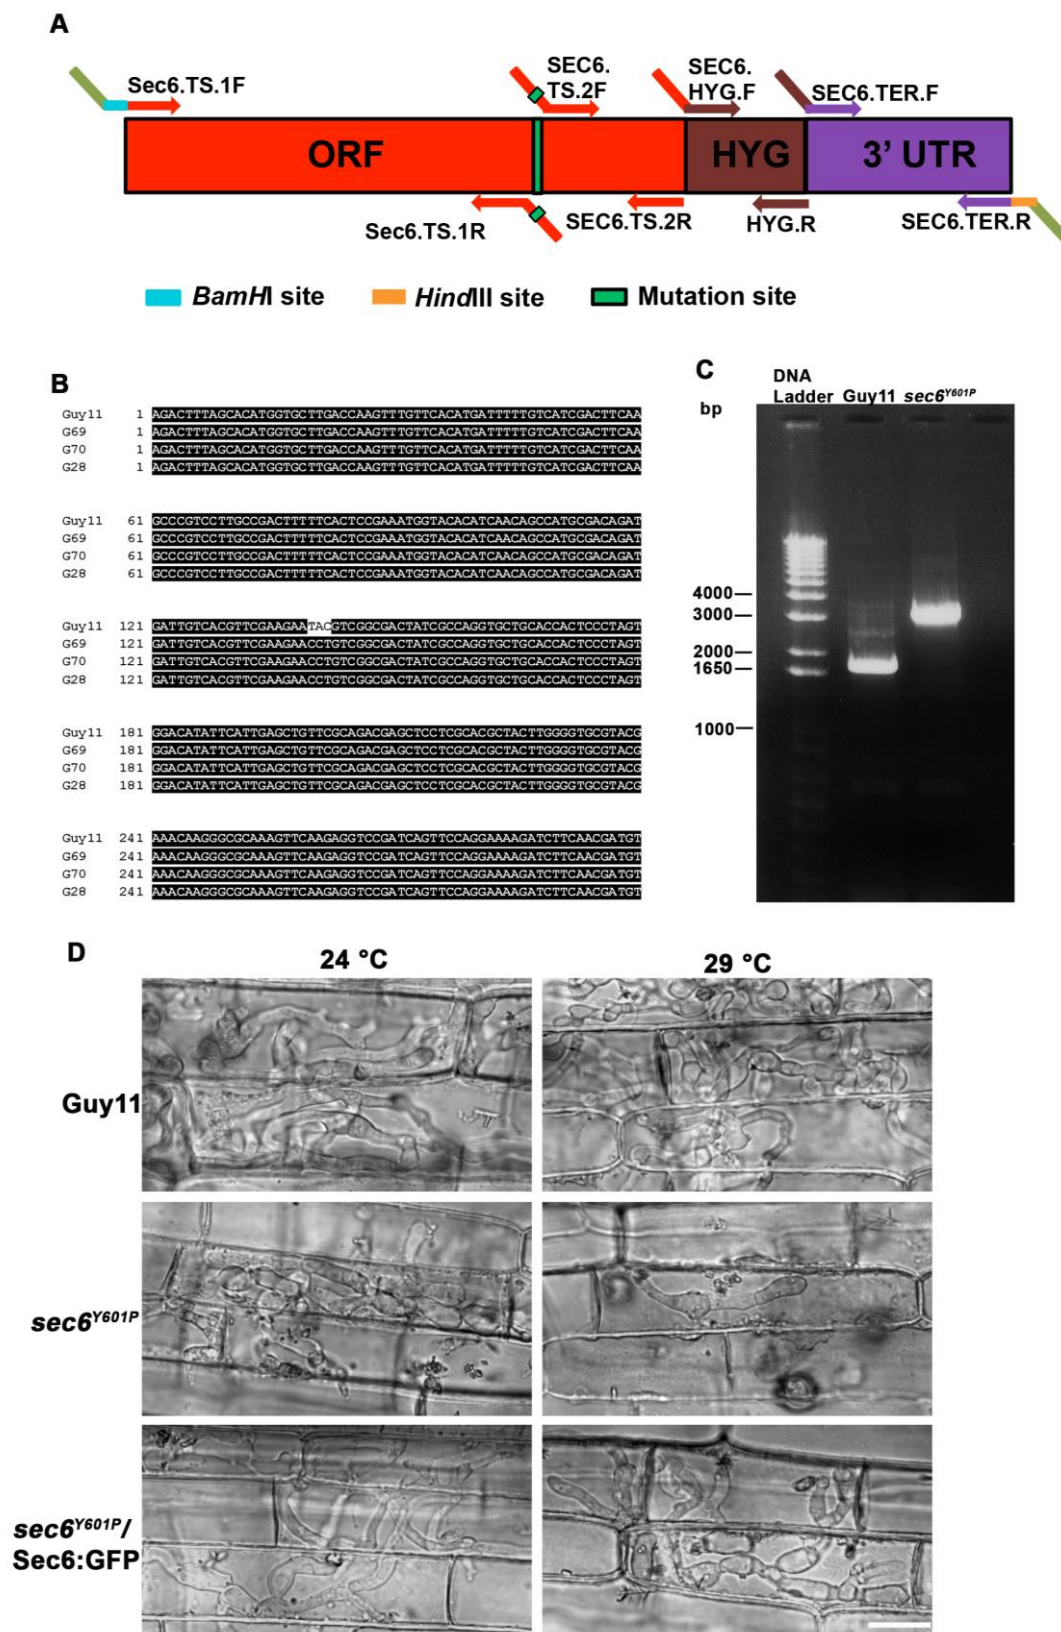



**Supplemental Figure 8. Generation of the *sec6*<sup>Y601P</sup> temperature-sensitive mutant.**

**(A)** Schematic representation of the construction of the *sec6*<sup>Y601P</sup> temperature-sensitive mutant. The PYC1 vector was used for cloning and primers were designed with 30 bp over-hangs complementary to the region and a 3 bp mutation introduced in SEC6.TS.1R and SEC6.TS.2F primers. The Hygromycin resistance gene cassette was cloned between the coding region and terminator of the *SEC6* gene. *Bam*HI and *Hind*III sites were introduced into the Sec6.TS.1F and Sec6.TER.R primers respectively. the *Bam*HI and *Hind*III digested fragment was used for transformation of the wild type strain Guy11, leading to allelic replacement of the native *SEC6* locus.

**(B)** Sequencing of 3 independent transformants and the isogenic wild type strain Guy11 was performed to confirm mutations.

**(C)** PCR confirmation to show the integration of selectable marker hygromycin (1.4 kb) between the ORF and terminator, using primers Sec6.TS.2F and Sec6.30.1.

**(D)** Functional complementation of *sec6*<sup>Y601P</sup> mutant with Sec6:GFP. A leaf sheath infection assay was performed to observe host tissue invasion of susceptible rice cultivar Co-39. Conidia were harvested from each strain and inoculated onto leaf sheath for 45 h. Inoculations were performed at 24 °C and 29 °C. At the permissive temperature, 24 °C, the wild type strain Guy11, *sec6*<sup>Y601P</sup> mutant and complemented strain (*sec6*<sup>Y601P</sup> mutant::Sec6:GFP) all infected rice epidermis normally. At the semi-restrictive temperature, 29 °C, the *sec6*<sup>Y601P</sup> mutant formed infection hyphae that remained in the first rice cell while the complemented strain and Guy11 infection hyphae proceeded to proliferate normally. Scale bar=10µm.

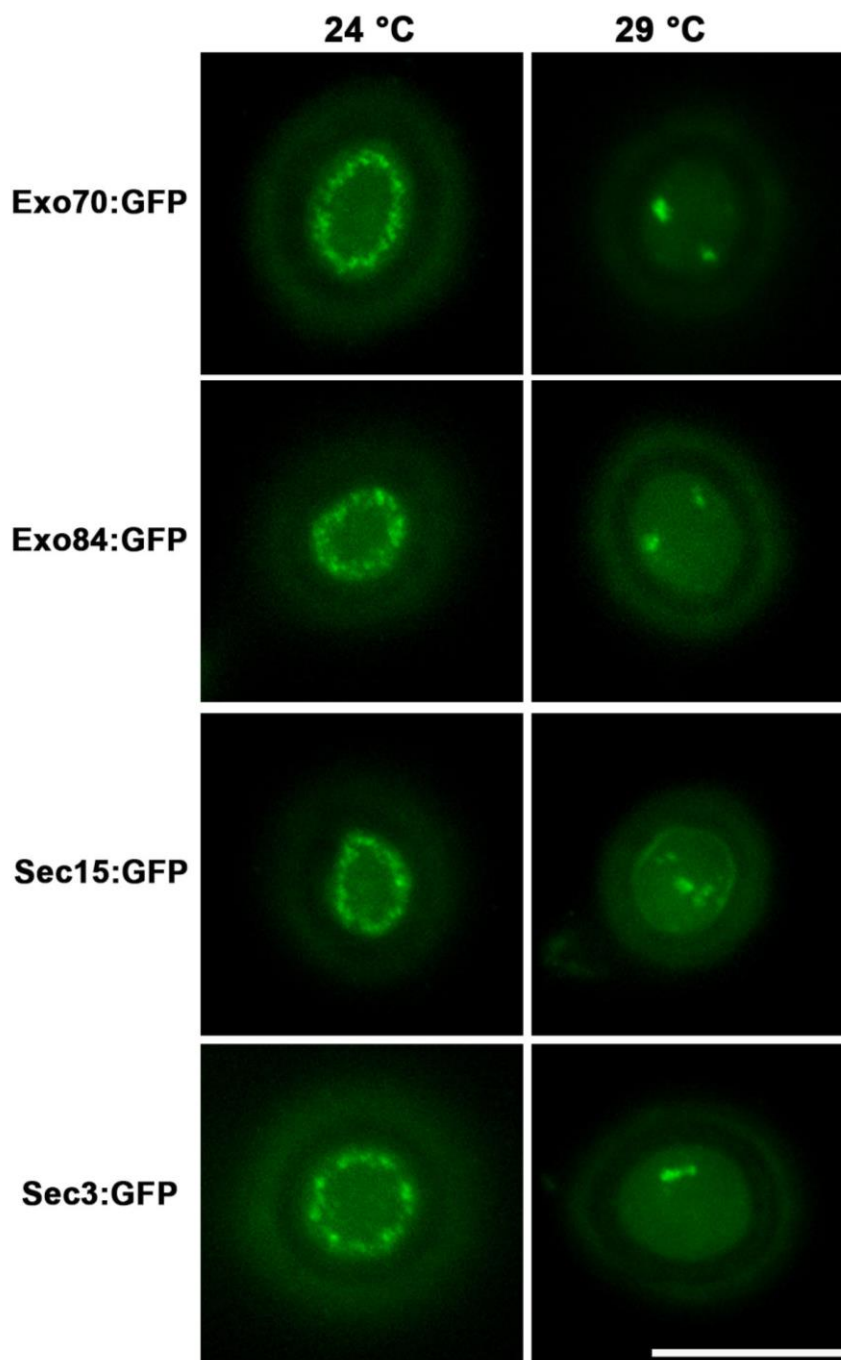

**Supplemental Figure 9. Expression and localization of Exo70:GFP, Exo84:GFP, Sec15:GFP and Sec3:GFP in the *sec6*<sup>Y601P</sup> mutant.** Independent transformants were selected, inoculated onto glass coverslips, and observed by epifluorescence microscopy. At the permissive temperature, 24 °C, Exo70-GFP, Exo84-GFP, Sec15-GFP and Sec3-GFP were all observed in a ring conformation at the appressorial pore, but at the semi-restrictive temperature they were mis-localized. Scale bar=10µm.

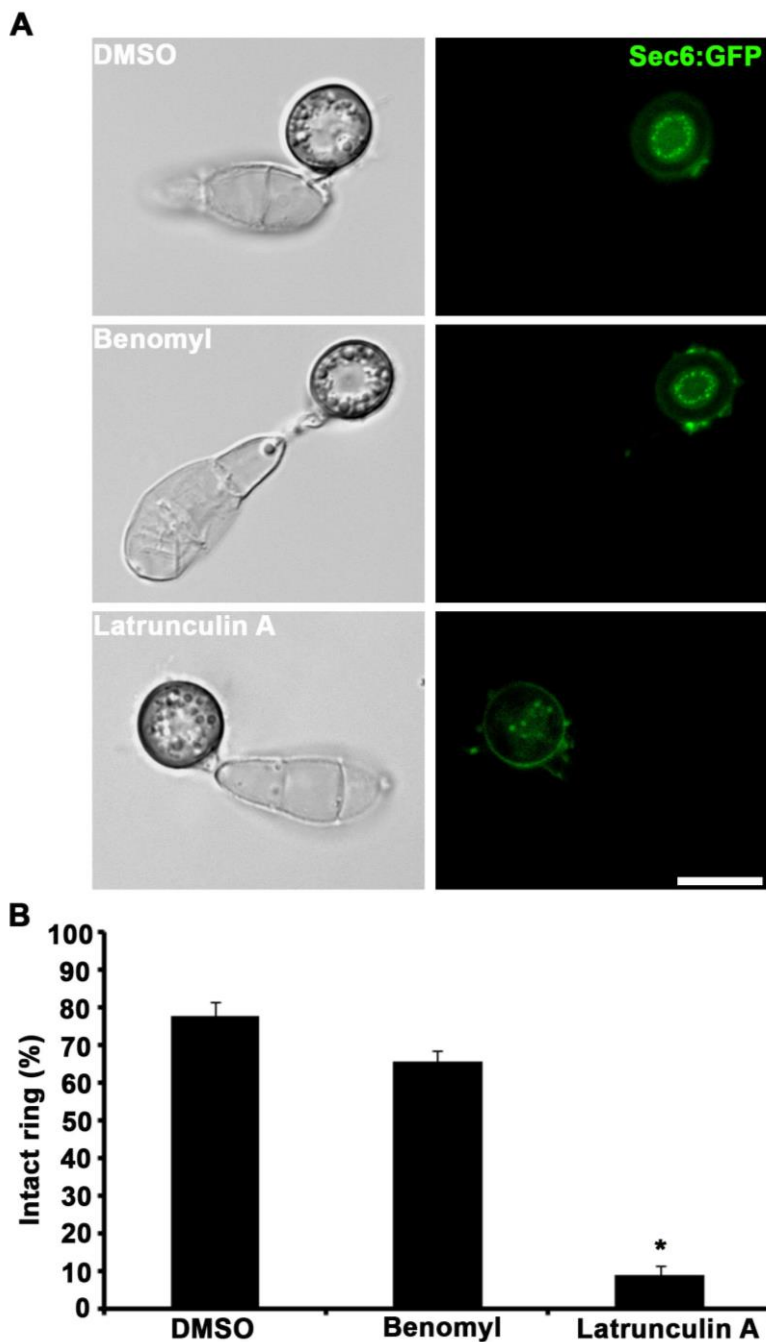

**Supplemental Figure 10. The F-actin cytoskeleton is required for exocyst ring formation at the appressorium pore.**

**(A)** In mature appressoria Sec6:GFP localized at the appressorium pore. Exposure to 10  $\mu$ M latrunculin A led to disorganization of the exocyst ring after 24 h, while there was no effect following exposure to 30  $\mu$ M benomyl or 0.1 % DMSO, which was used as a negative control. Scale bar=10 $\mu$ m.

**(B)** Bar chart to show the proportion of intact exocyst rings following exposure to latrunculin A compared with benomyl and DMSO treatments. Results were significant ( $P < 0.01$ ) (Values are mean  $\pm$  S.D., three experiments,  $n = 100$ ).

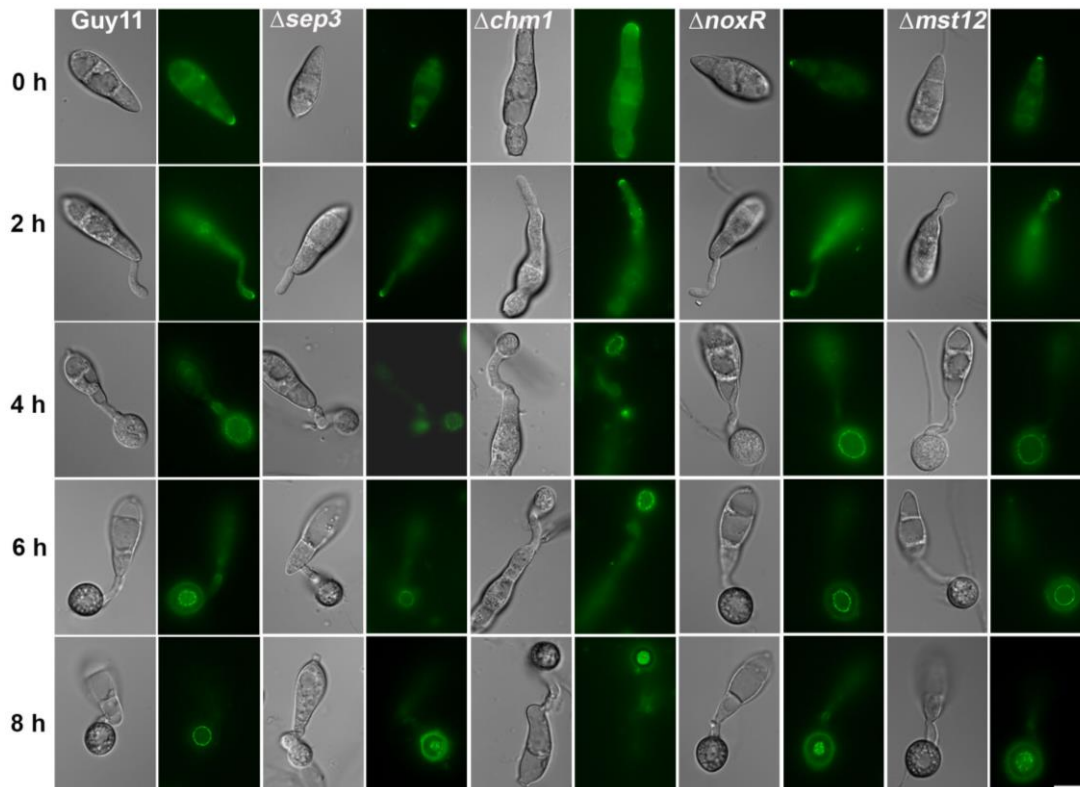

**Supplemental Figure 11. Sec6:GFP localization in  $\Delta sep3$ ,  $\Delta noxR$  and  $\Delta mst12$  mutants of *M. oryzae*.**

Micrograph to show the expression of Sec6:GFP in  $\Delta sep3$ ,  $\Delta chm1$ ,  $\Delta noxR$  and  $\Delta mst12$  mutants during a time course of appressorium development. Conidia were harvested from each strain and inoculated on glass coverslips and observed by epifluorescence microscopy. Localization of Sec6:GFP was identical in all strains before 6 h. After 8 h there a ring conformation was present in wild type strains but completely mis-localised in  $\Delta sep3$ ,  $\Delta chm1$ ,  $\Delta noxR$  and  $\Delta mst12$  mutants. Scale bar=10 $\mu$ m.

## Exo70:GFP

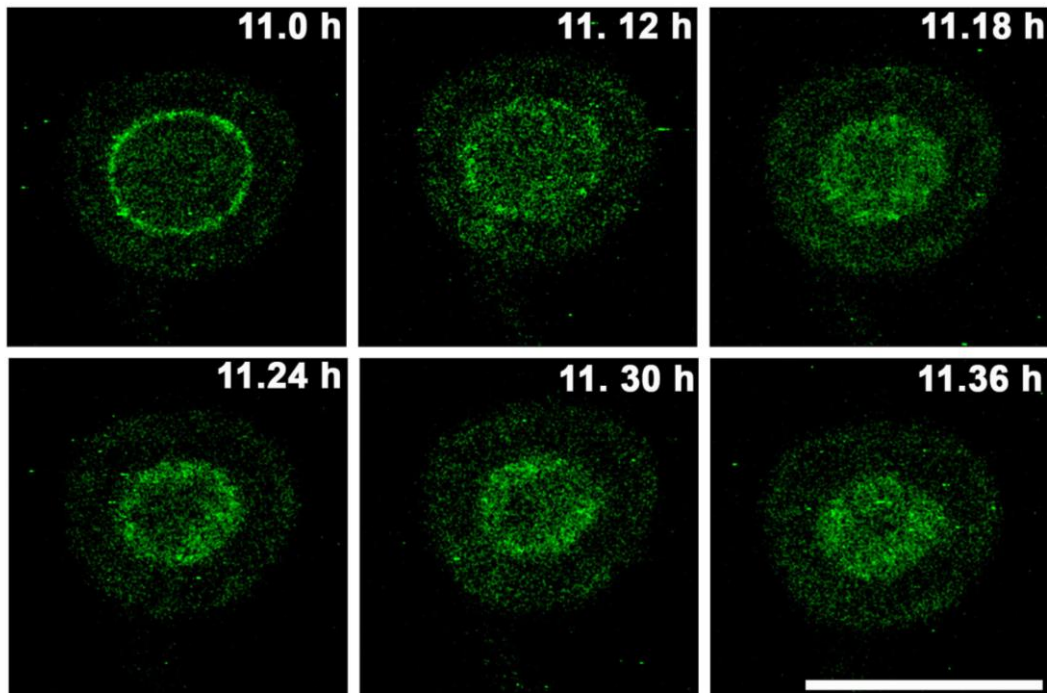

**Supplemental Figure 12. Transition of the exocyst from the cortex of the appressorium to the appressorial pore during maturation.**

Conidia were harvested from a strain expressing Exo70:GFP inoculated onto glass coverslip and observed by laser confocal microscopy. After 8 h of appressorium development, Exo70:GFP expression was observed and images recorded every 6 min throughout the 8h time course. Transition of Exo70:GFP from the cortex to the appressorium pore occurred after 11 h and the time of observation is shown in every image at the top corner. Scale bar = 10  $\mu$ m.

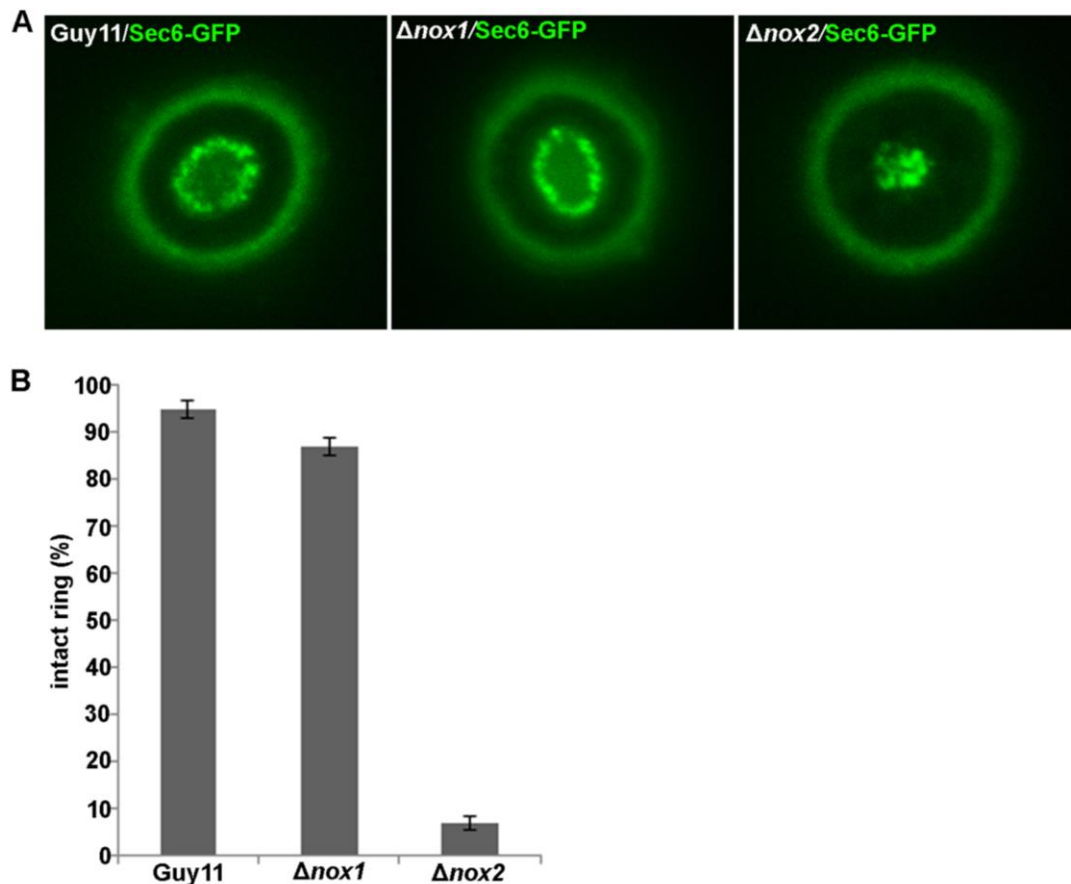

**Supplemental Figure 13. Sec6:GFP localization in  $\Delta nox1$  and  $\Delta nox2$  mutants of *M. oryzae*.**

**(A)** Epifluorescence microscopy to show localisation of the exocyst sub-unit Sec6:GFP expressed in Guy11,  $\Delta nox1$  and  $\Delta nox2$  mutants of *M. oryzae*. Conidial suspensions at  $5 \times 10^4 \text{ ml}^{-1}$  were inoculated onto glass coverslips and allowed to germinate and form appressoria. Expression of Sec6:GFP was observed 24 h after inoculation. Scale bar = 10  $\mu\text{m}$ .

**(B)** Bar chart showing the percentage of appressoria expressing Sec6:GFP 24 h after inoculation. Values are mean  $\pm$  S.D. for three repetitions of the experiment,  $n = 300$ .

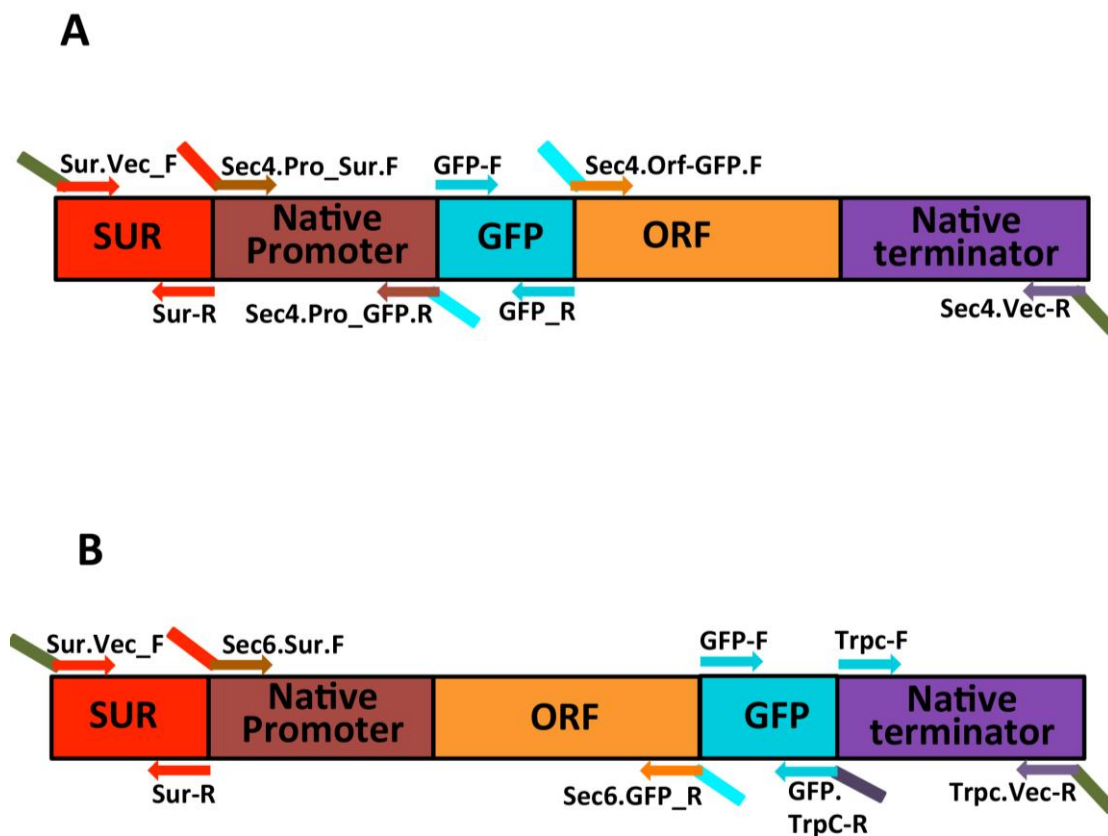

**Supplemental Figure 14. Schematic diagram to show cloning methodology for each GFP fusion construct.**

**(A)** N-terminal translational fusion constructs were designed with each primer having 30 bp of overlap with the adjoining fragment. The Sulphonylurea resistance gene cassette (*ILV1*) (Sweigard *et al*, 1997), a 2 kb fragment of the native promoter of each gene, the *GFP* gene, the gene coding sequence, and 1kb downstream of the stop codon (3' UTR and terminator) regions were separately amplified and cloned into the PYC1 vector.

**(B)** C-terminal translational fusions were constructed by amplifying the *ILV1* resistance cassette, 2 kb native promoter, the gene coding region, *GFP* and the *TrpC* terminator and cloning the fragments into the PYC1 vector. All constructs were made using recombination-mediated, gap repair.



**Supplementary Table 1. List of genes characterised in this study.**

| <b>Name</b>  | <b><i>S. cerevisiae</i><br/>protein</b> | <b><i>M. oryzae</i><br/>protein</b> | <b>Size<br/>(aa)</b> | <b>Function</b>                                                                                    | <b>Blastp e-<br/>value</b> |
|--------------|-----------------------------------------|-------------------------------------|----------------------|----------------------------------------------------------------------------------------------------|----------------------------|
| <i>SPA2</i>  | YLL021W                                 | MGG_03703                           | 951                  | Polarisome component                                                                               | 1.9e-23                    |
| <i>MLC1</i>  | YGL106W                                 | MGG_09470                           | 147                  | Myosin light chain regulator                                                                       | 1.3e-23                    |
| <i>FIM1</i>  | YDR129C                                 | MGG_04478                           | 651                  | actin-bundling protein,<br>maintenance of the actin<br>cytoskeleton and involved in<br>endocytosis | 1.3e-222                   |
| <i>SEC2</i>  | YNL272C                                 | MGG_02923                           | 670                  | Guanyl-nucleotide exchange<br>factor Rab-GTPase Sec4p                                              | 6.9e-23                    |
| <i>SEC4</i>  | YFL005W                                 | MGG_06135                           | 206                  | Rab-GTPase, involved in<br>exocytosis and autophagy                                                | 2.2e-60                    |
| <i>SEC3</i>  | YER008C                                 | MGG_03323                           | 1434                 | Exocyst subunit                                                                                    | 4.9e-29                    |
| <i>SEC5</i>  | YDR166C                                 | MGG_07150                           | 1055                 | Exocyst subunit                                                                                    | 1e-22                      |
| <i>SEC6</i>  | YIL068C                                 | MGG_03235                           | 755                  | Exocyst subunit                                                                                    | 9.2e-37                    |
| <i>SEC8</i>  | YPR055W                                 | MGG_03985                           | 1101                 | Exocyst subunit                                                                                    | 1.3e-41                    |
| <i>SEC10</i> | YLR166C                                 | MGG_04559                           | 851                  | Exocyst subunit                                                                                    | 4.7e-31                    |
| <i>SEC15</i> | YGL233W                                 | MGG_00471                           | 775                  | Exocyst subunit                                                                                    | 1.3e-43                    |
| <i>EXO84</i> | YBR102C                                 | MGG_06098                           | 681                  | Exocyst subunit                                                                                    | 5.4e-30                    |
| <i>EXO70</i> | YJL085W                                 | MGG_01760                           | 633                  | Exocyst subunit                                                                                    | 5.4e-30                    |
| <i>SEC9</i>  | YGR009C                                 | MGG_00522                           | 465                  | t-SNARE required for<br>secretory vesicle-plasma-<br>membrane fusion                               | 4.2e-09                    |
| <i>SNC1</i>  | YAL030W                                 | MGG_12614                           | 126                  | v-SNARE, involved in<br>exocytosis and endocytosis                                                 | 2.3e-24                    |
| <i>CDC42</i> | YLR229C                                 | MGG_00466                           | 194                  | Rho-like GTPase, important<br>for establishment and<br>maintenance of cell polarity                | 1e-85                      |
| <i>RAC1</i>  | -                                       | MGG_02731                           | 199                  | small GTPase involved in<br>actin cytoskeleton<br>organization and polarized<br>cell growth        |                            |

**Supplementary Table 2. Primers used in this study**

| Primer Name    | DNA Sequence (5'-3')                                         |
|----------------|--------------------------------------------------------------|
| Sec6.SUR_F     | GATTATTGCACGGGAATTGCATGCTCTCACCCGCTTTTTGTTGTCGCTCT           |
| Sec6.GFP_R     | GGTGAACAGCTCCTCGCCCTTGCTCACCATTGACTCTACTCATAATAG             |
| SEC6.TS.1F     | AACTGTTGGGAAGGGCGATCGGTGCGGGCCGGATCCAGCAGGAGTTCACACGCAAG     |
| SEC6.TS.1R     | TCGCCGACAGGTTCTTCAACGTGACAATCATCTGTCGCATGGCTGTTGA            |
| SEC6.TS.2F     | GATTGTCACGTTCAAGAACCTGTCGGCGACTATCGCCAGGTGCTGCACCACTC        |
| SEC6.TS.2R     | GCCAAGCCCCAAAATGCTCCTTCAATATCATCACTTGACTCTACTCATAATAGT       |
| SEC6.HYG.F     | CCCAGACTATTATGAGTAGAGTCAAGTGATGATATTGAAGGAGCATTTTT           |
| Sec6.30.1      | CTGGCGTTGGTTTTGAGTTTGTGCG                                    |
| HygR           | GGTCGGCATCTACTCTATTCC                                        |
| SEC6.TER.F     | GAGGGCAAAGGAATAGAGTAGATGCCGACCGAGATACCAACCAAAGGCACAATC       |
| SEC6.TER.R     | TTACACAGGAAACAGCTATGACCATTGATTAAGCTTCTATATACAGATGGGCGCTGAGGT |
| Sur_vec.F      | AACTGTTGGGAAGGGCGATCGGTGCGGGCCGTGACGTGCCAACGCCACAGTGC        |
| SurR           | GTCGACGTGAGAGCATGCAATTCC                                     |
| Cdc42.Pro_SUR  | GATTATTGCACGGGAATTGCATGCTCTCACTCGTCATACTGGCTGCTTCC           |
| Cdc42.Pro_GFP  | GGTGAACAGCTCCTCGCCCTTGCTCACCATTGTTAGAGCTGAGCGGGAG            |
| Cdc42.Orf-GFP  | ATCACTACGGCATGGACGAGCTGTACAAGATGGTGGTTGCAACGATTAA            |
| Cdc42.Ter-R    | TTACACAGGAAACAGCTATGACCATTGATTATCCAACTTTACCTGCC              |
| GFP-F          | ATGGTGAGCAAGGGCGAGGA                                         |
| GFP-R          | CTTGACAGCTCGTCCATGC                                          |
| Exo70.Sur_F    | GATTATTGCACGGGAATTGCATGCTCTCACTTCTTCTCCACACCTCCCAGCA         |
| EXO70.GFP_R    | GGTGAACAGCTCCTCGCCCTTGCTCACCATTGTAAGGCTGGCGAAAACGGCA         |
| Exo70 50.1     | GCTTCGGGCATTTTGGTCATCTGA                                     |
| Exo70 M13f     | GTCGTGACTGGGAAAACCCCTGGCGAGACCCAGATGATTGTAGCTCGT             |
| Exo70 M13r     | TCCTGTGTGAAATTGTTATCCGCTCAAGGGCAAGGGCAAGTATGTCAA             |
| EXO 30.1       | ATTACTTACCACGCTGCACATGGG                                     |
| Exo70.5.1      | CACTACATACCGCATTTTAACCAA                                     |
| Exo70.3.1      | TTCTTGATACTTTCCCTTGTCCTTG                                    |
| SEC5-SUR-F     | GATTATTGCACGGGAATTGCATGCTCTCACAGGAGTGGCCAGTTAGAATGA          |
| Sec5.GFP_R     | GGTGAACAGCTCCTCGCCCTTGCTCACCATTACGGAATCCTTGCGCTCCGTT         |
| Sec5.50.1      | TTGAACTTTGAAGCGATCTCGTCC                                     |
| Sec5.M13F      | GTCGTGACTGGGAAAACCCCTGGCGAACTAATCAACGAGCAGCCAAGA             |
| Sec5.M13R      | TCCTGTGTGAAATTGTTATCCGCTAAAAAGGTCAAGCGGTCAAACCTCG            |
| Sec5.30.1      | CTTACGGTTTTGAATGCTTGTGTG                                     |
| Sec5.ORF.F     | GACTCCAATGACAAAAAGGCAA                                       |
| Sec5.ORF.R     | CTGCGTATGACTGAATCTTTCC                                       |
| EXO84.SUR_F    | GATTATTGCACGGGAATTGCATGCTCTCACAGAGGGTGGATAGAAAAGGA           |
| EXO84.GFP_R    | GGTGAACAGCTCCTCGCCCTTGCTCACCATAGAGAGGCCGAGGCCAAGCG           |
| Sec3.SUR_F     | GATTATTGCACGGGAATTGCATGCTCTCACAATACAGGACTGGGAAACGC           |
| Sec3.GFP_R     | GGTGAACAGCTCCTCGCCCTTGCTCACCATTCCCTCTCCAAAGTTTCGAAA          |
| Sec4.Pro-Sur.F | GATTATTGCACGGGAATTGCATGCTCTCACTTTGGGTTTCGTCGGGCTT            |
| Sec 4.Pro-FP.R | GGTGAACAGCTCCTCGCCCTTGCTCACCATTGGTGTGCTGCGTTTGGAGCA          |
| Sec4.Orf-GFP.F | ATCACTCACGGCATGGACGAGCTGTACAAGATGGCCAACAGGAATTACGATG         |
| Sec4.Ter.R     | TTACACAGGAAACAGCTATGACCATTGATTAACGGACAACGACGCACTCTAT         |
| Sec9.Sur-F     | GATTATTGCACGGGAATTGCATGCTCTCACAATGATGCGGTGTCTTGAGT           |
| Sec9.GFP-R     | GGTGAACAGCTCCTCGCCCTTGCTCACCATACCCTTCTTGATAGTGC              |
| Sec15.SUR_F    | GATTATTGCACGGGAATTGCATGCTCTCACGGCATCCATAAAGCGAACT            |
| Sec15.GFP_R    | GGTGAACAGCTCCTCGCCCTTGCTCACCATTGCTGAAACCAAAACGAGATG          |
| SEC8-SUR-F     | GATTATTGCACGGGAATTGCATGCTCTCACCCAGAGGGCATTACACAAAA           |
| SEC8-GFP-R     | GGTGAACAGCTCCTCGCCCTTGCTCACCATAACCGTCCCCAAACCTTCAG           |
| Spa2-Sur-F     | GATAATGGGAATTGATTATTGCACGGGAATGCAATACGCACAACATGGAGC          |
| Spa2-GFP-R     | CAGCTCCTCGCCCTTGCTCACCATTGAAAAGTATCACCACCACC                 |
| 1F.FIM         | TGACTTCGATGAGCTGGATGG                                        |
| 2R.FIM         | ACATGGAAGGTAGGAGCGGAA                                        |
| 3R.FIM.Spel    | ACTAGTAGCCATCTTTTCATGCGTCGC                                  |
| 4F.FIM.Ncol    | GGTACCATGAACGTTTCTCAAACCTCAGAG                               |
| 5F.FIM.Xbal    | TATCTAGAATGAACGTTCTCAAACCTCAGAG                              |
| 1F.SNC1.GFP    | CACGGCATGGACGAGCTGTACAAGATGCCCGAAGACGCTCCCTAC                |
| 2R.SNC1.GFP    | CAGCTCCTCGCCCTTGCTCACCATTGTTGCGGTTGCGGCTCTTTC                |
| 3F.SNC1        | ATTTCCCATACGCTGCCGACCAT                                      |
| 4R.SNC1        | TTGCGTGCTGATGTTGTGATTG                                       |
| SNC1.F         | CGTATCACATCGTCAATTCTCA                                       |
| SNC1.R         | GACAACGCACTACAAAGGAGG                                        |
| Mlc1SUR        | GATTATTGCACGGGAATTGCATGCTCTCACGTACCATTGCAACGTGTTGGAG         |
| Mlc1GFP        | GGTGAACAGCTCCTCGCCCTTGCTCACCATTGTTGGCCAGAATGGTCTTAACAAG      |
