# Supplementary material
Source: PubMed Central journal article supplement (PMC4682301)
Supplement: supp_tpc.15.00552_TPC2015-00552-RAR1_Supplemental_Movie_Legends.pdf [file supp_tpc.15.00552_TPC2015-00552-RAR1_Supplemental_Movie_Legends.pdf]

## **Supplemental Movie Legends**

**Supplemental Movie 1. Polarisome component Spa2 localizes as a bright spot at the growing tip of the hypha.** Bar = 10  $\mu\text{m}$  Time shown at top left (min).

**Supplemental Movie 2. Fim1:GFP shows cortical actin patches at the sub-apical region of the growing hyphae.** Bar = 10  $\mu\text{m}$  Time shown at top left (min).

**Supplemental Movie 3. GFP-Cdc42 localizes to the tip of the growing hypha.** Bar = 10  $\mu\text{m}$  Time shown at top left (min).

**Supplemental Movie 4. The v-SNARE Snc1 actively localizes to the tip of the growing hypha.** Bar = 10  $\mu\text{m}$  Time shown at top left (min).

**Supplemental Movie 5. Three-dimensional rotational movie of exocyst sub-unit Sec6 localized at the base of the appressorium after 24 h.** Bar = 10  $\mu\text{m}$  Time shown at top left (min).

**Supplemental Movie 6. Transition of the exocyst from the cortex of the appressorium to the appressorial pore during maturation, following photobleaching.** Five pre-bleach scans and 100 post-bleach were captured at 1 sec intervals. Bar = 2.5 $\mu\text{m}$
